# Supplementary material for: Skin-inspired antibacterial conductive hydrogels customized for wireless flexible sensor and collaborative wound healing
Source: Royal Society of Chemistry journal article supplement (doi:10.1039/d3ta00648d), 2023-01-01
Supplement: d3ta00648d1.pdf [file d3ta00648d1.pdf]

## Supporting Information (SI)

# Skin-inspired Antibacterial Conductive Hydrogels Customized for Wireless Flexible Sensor and Accelerated Wound Healing†

Shuang Wang,<sup>a, b, 1</sup> Siwei Bi,<sup>c, 1</sup> Linna Zhang,<sup>b</sup> Ruiqi Liu,<sup>c</sup> Haibo Wang,<sup>a, b, d</sup> \* Jun Gu<sup>a\*</sup>

<sup>a</sup> Department of Cardiovascular surgery, West China Hospital, Sichuan University, Chengdu 610065, PR China.

<sup>b</sup> College of Biomass Science and Engineering, Sichuan University, Chengdu 610065, PR China. Tel: +86-28-85401296.

<sup>c</sup> Department of Burn and Plastic Surgery, West China Hospital, Sichuan University, Chengdu 610000, Sichuan, PR China.

<sup>d</sup> The Key Laboratory of Leather Chemistry and Engineering of Ministry of Education, Sichuan University, Chengdu 610065, PR China. Tel: +86-28-85401296.

\*Correspondence to: Haibo Wang (E-mail: whb6985@scu.cn); Jun Gu (E-mail: gujun@wchscu.cn)

<sup>1</sup> These authors contributed equally to this work.

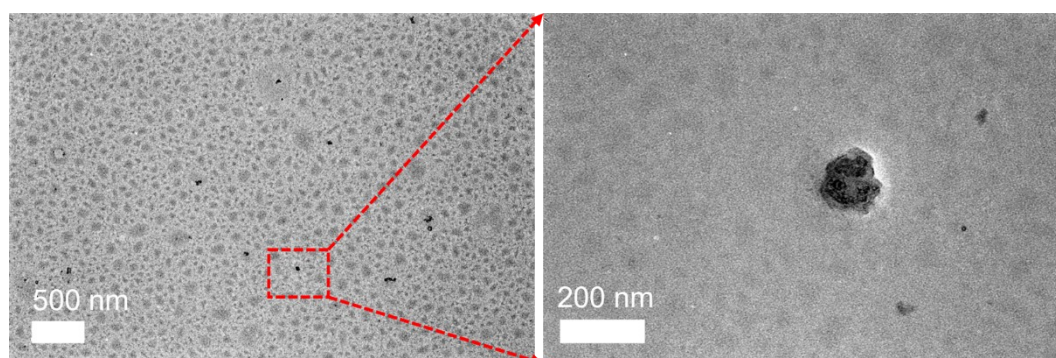

Fig. S1 The TEM image of SF@AgNPs particles.

SEM-EDX was applied to research the surface morphologies of PAS, PSAg, and PPMX hydrogels, as shown in **Fig. S2a-c**. Unlike the porous and fragile surfaces of pure PAS hydrogel (in **Fig. S2a**), PSAg hydrogel (in **Fig. S2b**) exhibited a smooth and flat surface with AgNPs embedded in the hydrogel matrix. Furthermore, a rough and wrinkled surface structure coated with 0 D SF@AgNP and 2 D MXene nanosheets was onto the surface of the PPMX hydrogel (in **Fig. S2c**). The above phenomenon demonstrated that the PDA@SF in the hydrogel was introduced into a covalent-crosslinked network to induce physical entanglement between PAS and SF chains, where the PDA chains chelating with Ag nanoparticles bridged the hydrogel matrix, resulting in a more stretchable and strong nano-enhanced hydrogel structure. Evidently, it is visible that MXene nanosheets endowed the hydrogel with a rough and hilly-like surface structure, which could withstand massive deformation and external force and retain its intrinsic mechanical characteristics for an extended time, allowing it to be used in wearable sensors to resist large deformation. Additionally, EDS element mapping analysis was used to analyze the elemental distribution of nanocomposite hydrogel. As shown in **Fig. S2**, C, N, O, Ag, S, Ti, and F were evenly distributed on the surface of PPMX hydrogel, indicating that MXene nanosheets and SF@AgNPs were uniformly dispersed in PPMX hydrogel.

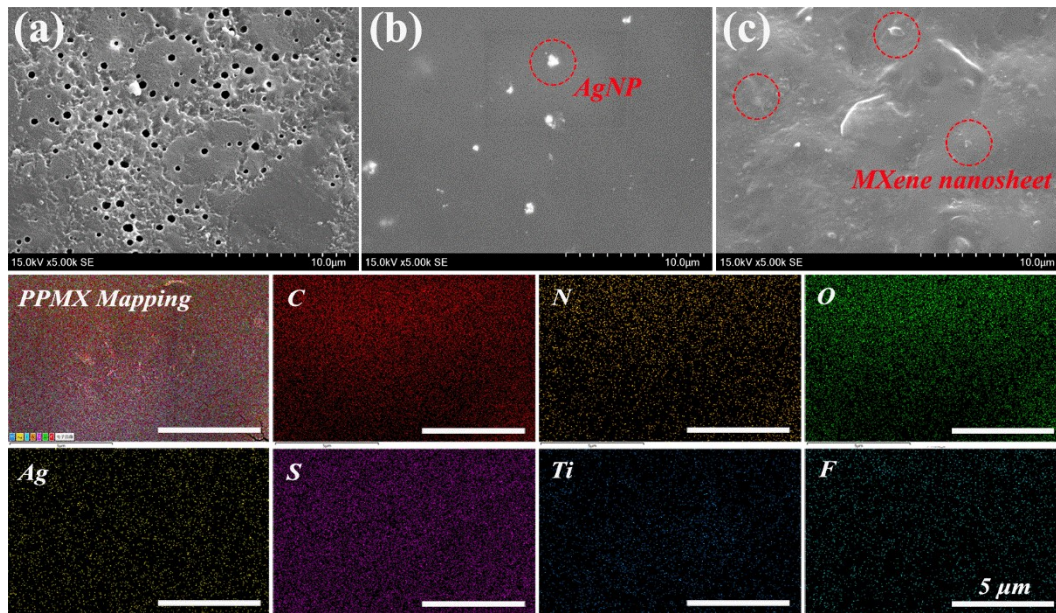

**Fig. S2.** Microstructure characterization. (a) SEM images of PAS hydrogel, (b) PSAg hydrogel, and (c) PPMX hydrogel; Corresponding EDX element mapping of PPMX hydrogel, including carbon (red), nitrogen (orange), oxygen (green), silver (yellow), sulfur (violet), titanium (indigo), and fluorine (dark green).

Stress-strain loops of stretch-release cycles were tested in Fig. S3. The result shown the residue strain was zero.

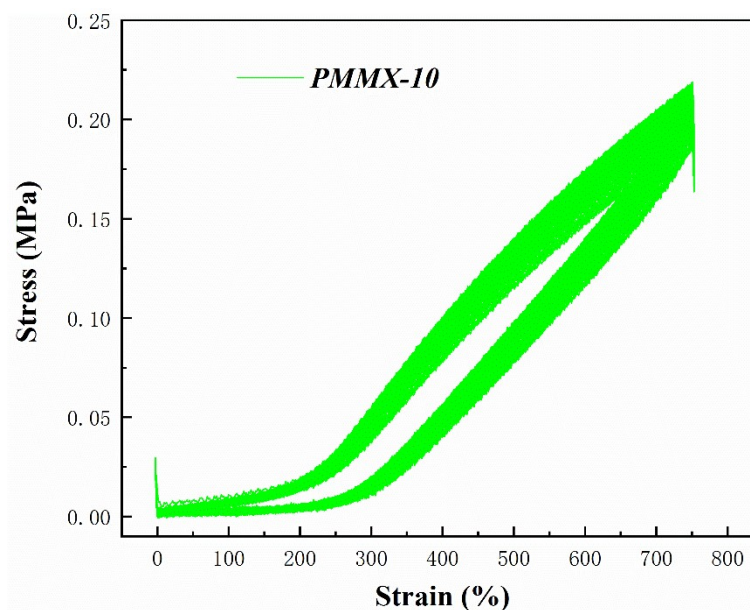

Fig. S3 100 stress-strain loops of stretch-release cycles.

As observed in Fig. S4, as the addition amount of SF@AgNPs increases, the conductivity of PPMX-x hydrogel gradually increases from 0.64 mS/cm, 1.16 mS/cm, 1.32 mS/cm, 1.48 mS/cm, to 1.77 mS/cm. Whereas, the conductivity of PSAg-5 hydrogel is 0.78 mS/cm. Above results prove that SF@AgNPs and MXenes both improve the conductive properties of hydrogel.

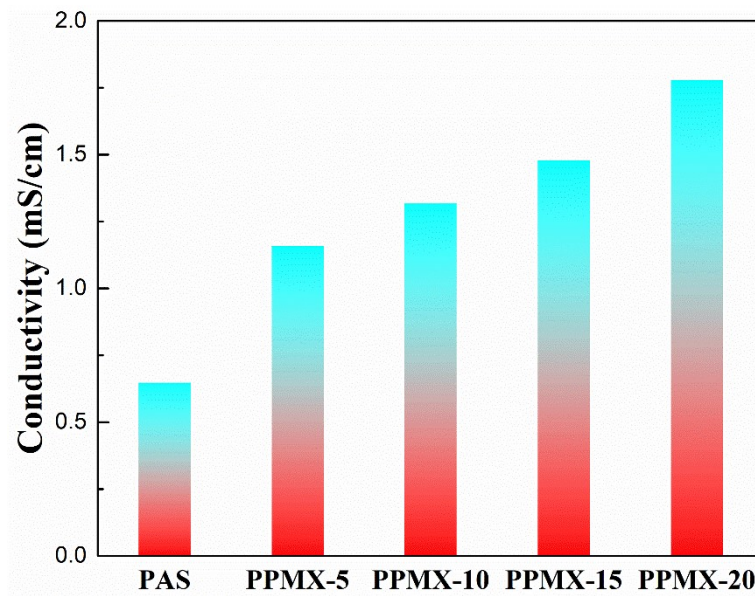

Fig. S4 The conductivity experiment of PPMX-x hydrogels

Generally, the sensitivity ( $S_p$ ) of the pressure sensor is calculated by  $S_p = \delta(\Delta I/I_0)/P$ ; the sensitivity ( $S_s$ ) of the strain sensor is calculated by  $S_s = \delta(\Delta I/I_0)/\varepsilon$ . Here,  $I_0$  and  $I$  represent the initial current of the sensor without loading and the output current under pressure, respectively. Besides,  $\Delta I$  is the relative change in current ( $I - I_0$ ). Additionally,  $P$  is the external pressure applied to the sensor and  $\varepsilon$  is the external elongation applied to the sensor.

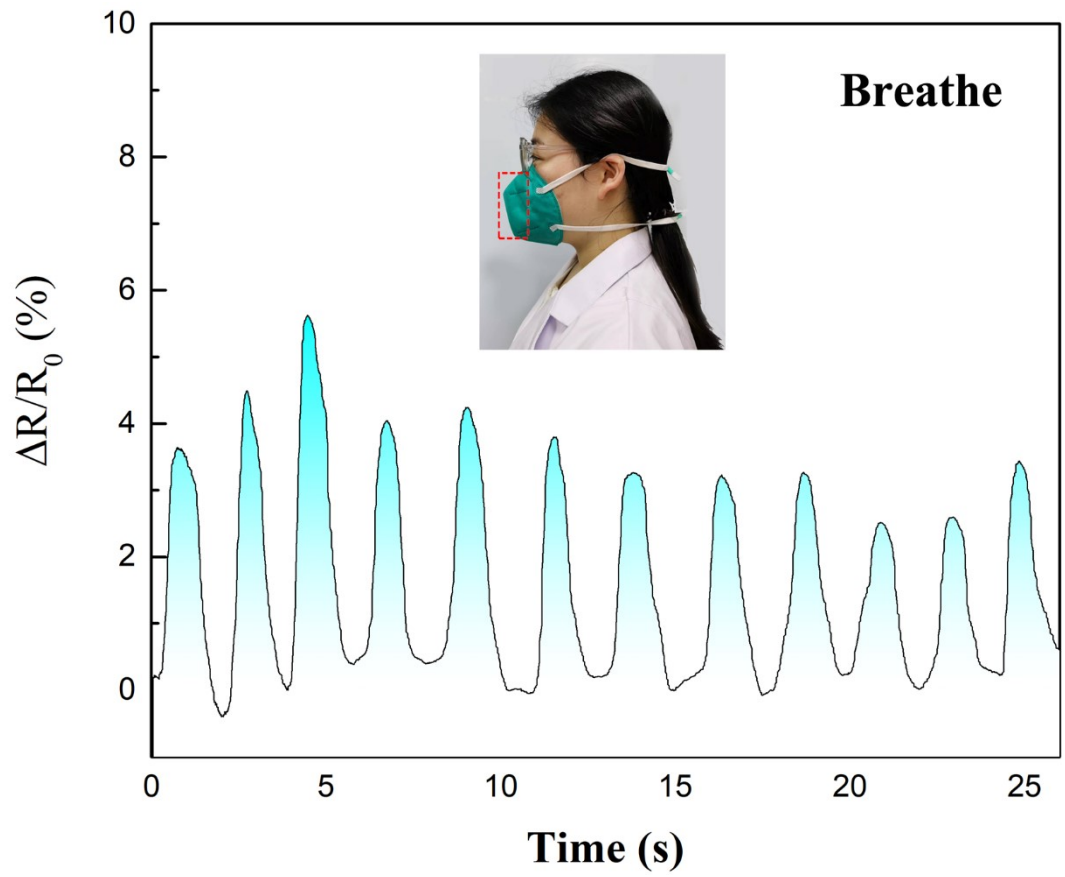

**Fig. S5** The PPMX sensors for respiratory monitor.

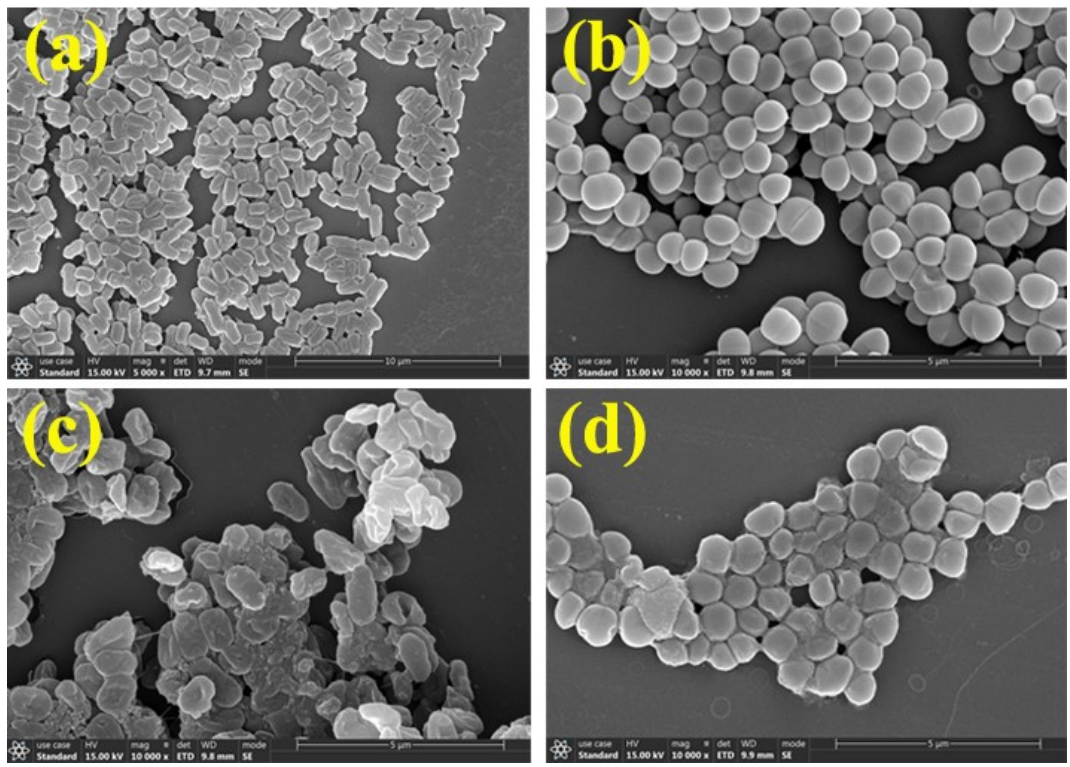

**Fig. S6** SEM images of *E. coli* and *S. aureus* cells in contact with the blank (a and b), and PPMX (c and d) hydrogel.

**Table S1.** The compositions of the PPMX nanocomposite hydrogels.

| Code    | AM<br>(g) | SF@AgNPs<br>(g) | MXene<br>(mg) | APS<br>(mg) | MBAA<br>(mg) | TEMED<br>( $\mu$ L) | Water<br>(g) | Water content<br>(wt%) |
|---------|-----------|-----------------|---------------|-------------|--------------|---------------------|--------------|------------------------|
| PAS     | 4         | 0               | 10            | 80          | 4            | 20                  | 10           | 71.4                   |
| PPMX-5  | 4         | 0.5             | 10            | 80          | 4            | 20                  | 10           | 69.0                   |
| PPMX-10 | 4         | 1.0             | 10            | 80          | 4            | 20                  | 10           | 66.7                   |
| PPMX-15 | 4         | 1.5             | 10            | 80          | 4            | 20                  | 10           | 64.5                   |
| PPMX-20 | 4         | 2.0             | 10            | 80          | 4            | 20                  | 10           | 62.5                   |

**Table S2.** Performance summary of representative adhesive hydrogels-based sensors.

| Materials                     | Sensing mode           | Max adhesive strength (kPa) | Tensile strength (kPa) | Strain (%) | Refs |
|-------------------------------|------------------------|-----------------------------|------------------------|------------|------|
| AgNP@GCOL/PAA                 | strain sensor          | 42.8                        | 123                    | 916        | S1   |
| TEDI                          | strain sensor          | 52.85                       | 54                     | 7300       | S2   |
| PAAc/SiO <sub>2</sub> -g-PAAm | strain/pressure sensor | 68                          | 64                     | 1600       | S3   |
| LPC                           | Piezoresistive sensor  | 66.6                        | 16.2                   | 2408       | S4   |

|                                 |                           |        |       |         |           |
|---------------------------------|---------------------------|--------|-------|---------|-----------|
| $\gamma$ -PGA/PEDOT: PSS        | strain/pressure<br>sensor | 53     | 385   | 652     | S5        |
| P(AAm-co-HEA)/Laponite<br>XLG   | strain/pressure<br>sensor | 32.24  | 145.6 | 1209.46 | S6        |
| LNP@Ag-Fe-PAA                   | strain sensor             | 18     | 37.8  | 1360    | S7        |
| AxNyMCz                         | strain sensor             | 109.3  | 664   | 1732    | S8        |
| $\beta$ -CD-g-(pAAm/pHMAM)      | strain/pressure<br>sensor | 50.1   | 88    | 6000    | S9        |
| PASU-Zn                         | strain sensor             | 610.6  | 790   | 1061    | S10       |
| Poly(AM-co-SBMA)/SF@AgNPs/MXene | strain/pressure<br>sensor | 998.98 | 669.2 | 1884.7  | This work |

**Table S3.** Performance summary of representative hydrogels-based sensors.

| Materials                                      | Sensing mode              | Sensing range (kPa)     | Pressure sensitivity (kPa <sup>-1</sup> )<br>1) | Refs |
|------------------------------------------------|---------------------------|-------------------------|-------------------------------------------------|------|
| EG/MoS <sub>2</sub> -<br>PAAM-Fe <sup>3+</sup> | pressure<br>sensor        | 1 to 13                 | 0.06                                            | S11  |
| PBA-co-<br>PEGDA/LiTFSI                        | /                         | 0.94 to 140             | 2.871                                           | S12  |
| PVA-GA/P(AA-<br>co-Am)                         | strain/pressure<br>sensor | 0 to 2.74               | 2.14                                            | S13  |
| EMCP                                           | Piezoresistive            | 8×10 <sup>-4</sup> to 3 | 133.1                                           | S14  |

|                                 |                                |              |        |     |
|---------------------------------|--------------------------------|--------------|--------|-----|
|                                 | sensor                         |              |        |     |
| PAM/PC                          | strain/pressure sensor         | 0 to 400     | 0.035  | S15 |
| PVA/SA/BC/MC                    | strain/pressure sensor         | 0 to 337     | 0.033  | S16 |
| C                               | sensor                         |              |        |     |
| Gel/PAM/NaCl/O                  | strain/pressure sensor         | 0 to 250     | 0.56   | S17 |
| - $\beta$ -CD                   | sensor                         |              |        |     |
| PVA/HPS-PA                      | strain/pressure sensor         |              | 3.6    | S18 |
| CS-PHEAA                        | strain/pressure sensor         | 0 to 136     | 0.023  | S19 |
| PAM/NFC/Ag                      | strain/pressure sensor         | 0 to 50      | 9.5    | S20 |
| PVA/Lig-Ag NPs                  | piezoresistive pressure sensor | 0 to 1       | 3.63   | S21 |
| PAM/SF/PEDOT                    | strain/pressure sensor         | 0.5 to 119.4 | 0.0137 | S22 |
| : PSS                           | sensor                         |              |        |     |
| PVA/C-                          | capacitive                     | 0 to 300     | 135.4  | S23 |
| Chitosan/ $f$ -CD               | pressure sensor                |              |        |     |
| CS-P(AM-co-AA)/Fe <sup>3+</sup> | strain/pressure sensor         | 0 to 250     | 0.208  | S24 |
| P(AA-co-                        | /                              | /            | 0.018  | S25 |



|                                          |                               |             |        |     |
|------------------------------------------|-------------------------------|-------------|--------|-----|
| AM)/catechol-Fe                          |                               |             |        |     |
|                                          | 3+                            |             |        |     |
| CNTs/HAPAAm                              | strain/pressure<br>sensor     | 0 to 50     | 0.127  | S26 |
| PAM/PVA/KCl                              | pressure sensor               | 0 to 7      | 0.05   | S27 |
| PAM/SA/Ca <sup>2+</sup>                  | capacitive<br>pressure sensor | 0.0025 to 2 | 3.19   | S28 |
| P(AM-co-<br>AEMA)/F127-<br>CHO/LiCl      | strain/pressure<br>sensor     | 0 to 30     | 0.25   | S29 |
| PVA/PANI                                 | capacitive<br>pressure sensor | 0 to 7.4    | 7.7    | S30 |
| PVA/CNF/NaCl                             | strain/pressure<br>sensor     | 0 to 35     | 0.22   | S31 |
| [EMI][TFSA]/P(<br>VDF-HFP) ionic<br>gel  | capacitive<br>pressure sensor | 0 to 50     | 41.64  | S32 |
| [EMIM][TFSI]/P(<br>VDF-HFP) ionic<br>gel | capacitive<br>pressure sensor | 1 to 140    | 54.31  | S33 |
| [EMIM][TFSI]/P(<br>VDF-HFP) ionic        | capacitive<br>pressure sensor | 0.4 to 50   | 145.45 | S34 |

|                                   |                           |         |       |           |
|-----------------------------------|---------------------------|---------|-------|-----------|
| gel                               |                           |         |       |           |
| PAM/SA/MXene/<br>Zn <sup>2+</sup> | strain/pressure<br>sensor | 0 to 60 | 782.7 | S35       |
| PAM/PSAg/MXene                    | strain/pressure<br>sensor | 0 - 12  | 860.6 | This work |

## References

- S1. Zhang, Min; Yang, Qili; Hu, Tianshuo; Tang, Lele; Ni, Yonghao; Chen, Lihui; Wu, Hui; Huang, Liulian; Ding, Cuicui. Adhesive, Antibacterial, Conductive, Anti-UV, Self-Healing, and Tough Collagen-Based Hydrogels from a Pyrogallol-Ag Self-Catalysis System. *ACS Applied Materials & Interfaces*, 2022, Vol.14 (7), 8728-8742.
- S2. Mo, Jiaying; Dai, Yuhang; Zhang, Chao; Zhou, Yongsen; Li, Wanbo; Song, Yuxin; Wu, Chenyang; Wang, Zuankai. Design of ultra-stretchable, highly adhesive and self-healable hydrogels: Via tannic acid-enabled dynamic interactions. *Materials Horizons*, 2021, Vol.8 (12), 3409-3416.
- S3. Yu, Xiaohui; Zheng, Yong; Zhang, Haopeng; Wang, Yufei; Fan, Xiaoshan; Liu, Tianxi. Fast-Recoverable, Self-Healable, and Adhesive Nanocomposite Hydrogel Consisting of Hybrid Nanoparticles for Ultrasensitive Strain and Pressure Sensing. *Chemistry of Materials*, 2021, Vol.33 (15), 6146-6157.
- S4. Cao, Jinfeng; Zhao, Yanan; Jin, Shicun; Li, Jianzhang; Wu, Ping; Luo, Zhiqiang. Flexible Lignin-based hydrogels with Self-healing and adhesive ability driven by noncovalent interactions. *Chemical Engineering Journal*, 2022, Vol.429, 132252.

- S5. Zhang, Chenyang; Wang, Mingxu; Jiang, Conghui; Zhu, Peizhi; Sun, Baoquan; Gao, Qiang; Gao, Chunxia; Liu, Ruiyuan. Highly adhesive and self-healing  $\gamma$ -PGA/PEDOT: PSS conductive hydrogels enabled by multiple hydrogen bonding for wearable electronics. *Nano Energy*, 2022-05, Vol.95.
- S6. He, Zhirui; Yuan, Weizhong. Highly Stretchable, Adhesive Ionic Liquid-Containing Nanocomposite Hydrogel for Self-Powered Multifunctional Strain Sensors with Temperature Tolerance. *ACS Applied Materials & Interfaces*, 2021, Vol.13 (44), 53055-53066.
- S7. Cui, Han; Jiang, Weikun; Wang, Chao; Ji, Xingxiang; Liu, Yu; Yang, Guihua; Chen, Jiachuan; Lyu, Gaojin; Ni, Yonghao. Lignin nanofiller-reinforced composites hydrogels with long-lasting adhesiveness, toughness, excellent self-healing, conducting, ultraviolet-blocking and antibacterial properties. *Composites. Part B, Engineering*, 2021, Vol.225, 109316.
- S8. Liu, Rui; Cui, Lei; Wang, Haozheng; Chen, Qianbing; Guan, Ying; Zhang, Yongjun. Tough, Resilient, Adhesive, and Anti-Freezing Hydrogels Cross-Linked with a Macromolecular Cross-Linker for Wearable Strain Sensors. *ACS Applied Materials & Interfaces*, 2021, Vol.13 (35), 42052-42062.
- S9. Roy, Arpita; Manna, Kalipada; Ray, Preetam Guha; Dhara, Santanu; Pal, Sagar.  $\beta$ -Cyclodextrin-Based Ultrahigh Stretchable, Flexible, Electro- and Pressure-Responsive, Adhesive, Transparent Hydrogel as Motion Sensor. *ACS Applied Materials & Interfaces*, 2022-04-08.
- S10. Wang, Haibo; Li, Xiaoyi; Ji, Ying; Xu, Junhuai; Ye, Zhifan; Wang, Shuang; Du,

- Xiaosheng. Highly transparent, mechanical, and self-adhesive zwitterionic conductive hydrogels with polyurethane as a cross-linker for wireless strain sensors. *Journal of Materials Chemistry. B*, 2022-03-18.
- S11. J. Wang, J. Qu, Y. X. Liu, S. Wang, X. L. Liu, Y. P. Chen, P. Y. Qi, G. H. Miao, X. F. Liu, “Crocodile skin” ultra-tough, rapidly self-recoverable, anti-dry, anti-freezing, MoS<sub>2</sub>-based ionic organohydrogel as pressure sensors, *Colloids Surf. A, Physicochem. Eng. Asp.* 625 (2021) 126458.
- S12. P. P. Zhang, Y. H. Chen, Z. H. Guo, W. B. Guo, X. Pu, Z. L. Wang, Stretchable, Transparent, and Thermally Stable Triboelectric Nanogenerators Based on Solvent-Free Ion-Conducting Elastomer Electrodes, *Adv. Funct. Mater.* 30(15) (2020) 1909252.
- S13. H. W. Zhou, J. L. Lai, X. L. Jin, H. B. Liu, X. S. Li, W. X. Chen, A. J. Ma, X. C. Zhou, Intrinsically adhesive, highly sensitive and temperature tolerant flexible sensors based on double network organohydrogels. *Chem. Eng. J.* 413 (2021) 127544.
- S14. L. J. Pan, A. Chortos, G. H. Yu, Y. Q. Wang, S. Isaacson, R. Allen, Y. Shi, R. Dauskardt, Z. N. Bao, An ultra-sensitive resistive pressure sensor based on hollow-sphere microstructure induced elasticity in conducting polymer film, *Nat. Commun.* 5(1) (2014) 3002.
- S15. R. Liu, H. Z. Wang, W. J. Lu, L. Cui, S. Wang, Y. F. Wang, Q. B. Chen, Y. Guan, Y. J. Zhang, Highly tough, stretchable and resilient hydrogels strengthened with molecular springs and their application as a wearable, flexible sensor, *Chem. Eng.*

- J. 415 (2021) 128839.
- S16. J. Y. Huang, M. Zhao, Y. B. Cai, M. Zimniewska, D. W. Li, Q. F. Wei, A Dual-Mode Wearable Sensor Based on Bacterial Cellulose Reinforced Hydrogels for Highly Sensitive Strain/Pressure Sensing, *Adv. Electron. Mater.* 6(1) (2020) 1900934.
- S17. J. Yu, M. Wang, C. Dang, C. Z. Zhang, X. Feng, G. X. Chen, Z. Y. Huang, H. S. Qi, H. C. Liu, J. Kang, Highly stretchable, transparent and conductive double-network ionic hydrogels for strain and pressure sensors with ultrahigh sensitivity, *J. Mater. Chem. C* 9(10) (2021) 3635-3641.
- S18. H. W. Zhou, Z. W. Wang, W. F. Zhao, X. M. Tong, X. L. Jin, X. C. Zhang, Y. Yu, H. B. Liu, Y. C. Ma, S. S. Li, W. X. Chen, Robust and sensitive pressure/strain sensors from solution processable composite hydrogels enhanced by hollow-structured conducting polymers, *Chem. Eng. J.* 403 (2021) 126307.
- S19. Y. Y. Yang, Y. T. Yang, Y. X. Cao, X. Wang, Y. R. Chen, H. Y. Liu, Y. F. Gao, J. F. Wang, C. Liu, W. J. Wang, J. K. Yu, D. C. Wu, Anti-freezing, resilient and tough hydrogels for sensitive and large-range strain and pressure sensors, *Chem. Eng. J.* 403 (2021) 126431.
- S20. S. Wang, J. Xiang, Y. G. Sun, H. L. Wang, X. S. Du, X. Cheng, Z. L. Du, H. B. Wang, Skin-inspired nanofibrillated cellulose-reinforced hydrogels with high mechanical strength, long-term antibacterial, and self-recovery ability for wearable strain/pressure sensors, *Carbohydr. Polym.*, 261 (2021) 117894.
- S21. X. Han, Z. L. Lv, F. L. Ran, L. Dai, C. Y. Li, C. L. Si, Green and stable

- piezoresistive pressure sensor based on lignin-silver hybrid nanoparticles/polyvinyl alcohol hydrogel, *Int. J. Biol. Macromol.* 176 (2021) 78-86.
- S22. F. L. He, X. Y. You, H. Gong, Y. Yang, T. Bai, W. G. Wang, W. X. Guo, X. Y. Liu, M. D. Ye, Stretchable, Biocompatible, and Multifunctional Silk Fibroin-Based Hydrogels toward Wearable Strain/Pressure Sensors and Triboelectric Nanogenerators, *ACS Appl. Mater. Inter.* 12(5) (2020) 6442-6450.
- S23. B. Ryplida, I. In, S. Y. Park, Tunable Pressure Sensor of f-Carbon Dot-Based Conductive Hydrogel with Electrical, Mechanical, and Shape Recovery for Monitoring Human Motion, *ACS Appl. Mater. Inter.* 12(46) (2020) 51766-51775.
- S24. H. Y. Liu, X. Wang, Y. X. Cao, Y. Y. Yang, Y. T. Yang, Y. F. Gao, Z. S. Ma, J. F. Wang, W. J. Wang, D. C. Wu, Freezing-Tolerant, Highly Sensitive Strain and Pressure Sensors Assembled from Ionic Conductive Hydrogels with Dynamic Cross-Links, *ACS Appl. Mater. Inter.* 12(22) (2020) 25334-25344.
- S25. Z. R. Jia, Y. Zeng, P. F. Tang, D. L. Gan, W. S. Xing, Y. Hou, K. F. Wang, C. M. Xie, X. Lu, Conductive, Tough, Transparent, and Self-Healing Hydrogels Based on Catechol–Metal Ion Dual Self-Catalysis, *Chem. Mater.* 31(15) (2019) 5625-5632.
- S26. Z. H. Qin, X. Sun, Q. Y. Yu, H. T. Zhang, X. J. Wu, M. M. Yao, W. W. Liu, F. L. Yao, J. J. Li, Carbon Nanotubes/Hydrophobically Associated Hydrogels as Ultrastretchable, Highly Sensitive, Stable Strain, and Pressure Sensors, *ACS Appl. Mater. Inter.* 12(4) (2020) 4944-4953.

- S27. G. Ge, Y. Z. Zhang, J. J. Shao, W. J. Wang, W. L. Si, W. Huang, X. C. Dong, Stretchable, Transparent, and Self-Patterned Hydrogel-Based Pressure Sensor for Human Motions Detection, *Adv. Funct. Mater.* 28(32) (2018) 1802576.
- S28. Y. F. Wang, M. Tebyetekerwa, Y. Liu, M. Wang, J. X. Zhu, J. S. Xu, C. Zhang, T. X. Liu, Extremely stretchable and healable ionic conductive hydrogels fabricated by surface competitive coordination for human-motion detection, *Chem. Eng. J.* 420 (2021) 127637.
- S29. M. Wu, J. S. Chen, Y. H. Ma, B. Yan, M. F. Pan, Q. Y. Peng, W. D. Wang, L. B. Han, J. F. Liu, H. B. Zeng, Ultra elastic, stretchable, self-healing conductive hydrogels with tunable optical properties for highly sensitive soft electronic sensors, *J. Mater. Chem. A* 8(46) (2020) 24718-24733.
- S30. H. W. Zhou, M. C. Wang, X. L. Jin, H. B. Liu, J. L. Lai, H. T. Du, W. X. Chen, A. J. Ma, Capacitive Pressure Sensors Containing Reliefs on Solution-Processable Hydrogel Electrodes, *ACS Appl. Mater. Inter.* 13(1) (2021) 1441-1451.
- S31. Y. H. Ye, Y. F. Zhang, Y. Chen, X. S. Han, F. Jiang, Cellulose Nanofibrils Enhanced, Strong, Stretchable, Freezing-Tolerant Ionic Conductive Organohydrogel for Multi-Functional Sensors, *Adv. Funct. Mater.* 30(35) (2020) 2003430.
- S32. S. H. Cho, S. W. Lee, S. Yu, H. Kim, S. Chang, D. Kang, I. Hwang, H. S. Kang, B. Jeong, E. H. Kim, S. M. Cho, K. L. Kim, H. Lee, W. Shim, C. Park, Micropatterned Pyramidal Ionic Gels for Sensing Broad-Range Pressures with High Sensitivity, *ACS Appl. Mater. Inter.* 9(11) (2017) 10128-10135.

- S33. Z. G. Qiu, Y. B. Wan, W. H. Zhou, J. Y. Yang, J. L. Yang, J. Huang, J. M. Zhang, Q. X. Liu, S. Y. Huang, N. N. Bai, Z. G. Wu, W. Hong, H. Wang, C. F. Guo, Ionic Skin with Biomimetic Dielectric Layer Templated from Calathea Zebrine Leaf, *Adv. Funct. Mater.* 28(37) (2018) 1802343.
- S34. Q. Zou, Z. M. Lei, T. Xue, S. H. Li, Z. M. Ma, Q. Su, Highly sensitive flexible pressure sensor based on ionic dielectric layer with hierarchical ridge microstructure, *Sens. Actuator A Phys.* 313 (2020) 112218.
- S35. H. B. Wang, Y. K. Zou, Y. Ji, K. Zhong, X. S. Du, Z. L. Du, X. Cheng, S. Wang, Tough and extremely temperature-tolerance nanocomposite organohydrogels as ultrasensitive wearable sensors for wireless human motion monitoring, *Composites Part A.* 157 (2022) 106905.
